# Supplementary material
Source: PubMed Central journal article supplement (PMC3148709)
Supplement: supp_ASN.2010111125_Beck_et_al_JASN-2010-11-1125-R1_Supplemental_Material.pdf [file supp_ASN.2010111125_Beck_et_al_JASN-2010-11-1125-R1_Supplemental_Material.pdf]

## Supplemental Material

### Anti-PLA<sub>2</sub>R Autoantibodies and Response to Rituximab Treatment in Membranous Nephropathy

Laurence H. Beck, Jr., Fernando C. Fervenza, David M. Beck, Ramon G.B. Bonegio, Fahim A. Malik, Stephen B. Erickson, Fernando G. Cosio, Daniel C. Cattran and David J. Salant

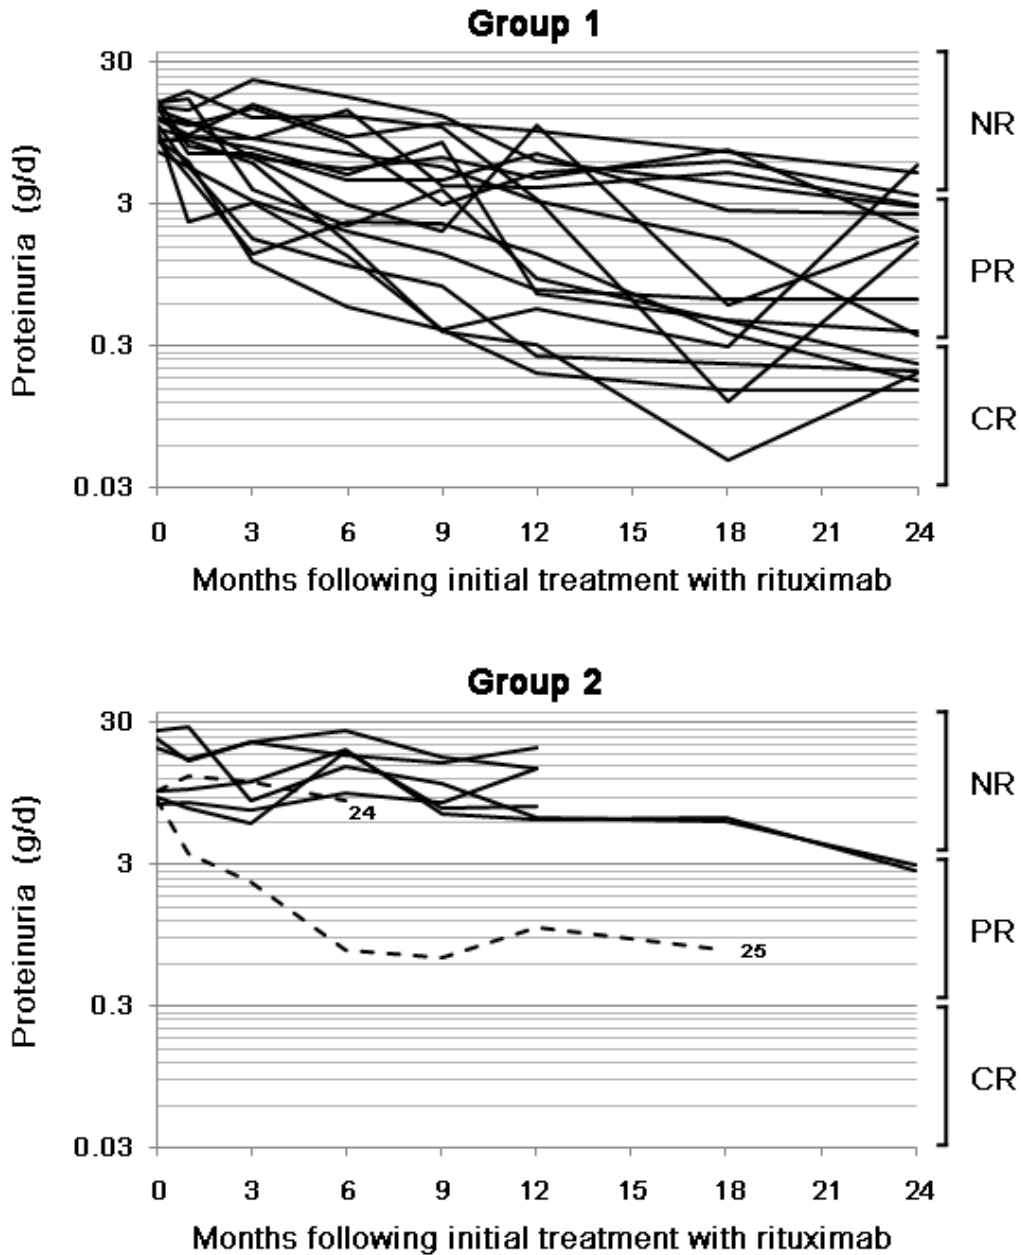

**Supplemental Figure 1:** Log<sub>10</sub> plot showing median proteinuria values at baseline and following treatment in those individuals who cleared the anti-PLA<sub>2</sub>R antibodies (Group 1) versus those that had persistent anti-PLA<sub>2</sub>R throughout follow-up (Group 2). NR, no response; PR, partial response; CR, complete response. Dashed lines and subject numbers in the bottom graph correspond to the two patients missing 12 month anti-PLA<sub>2</sub>R data.

|                                                                      | <b>12 month<br/>proteinuria</b> | <b>24 month<br/>proteinuria</b> |
|----------------------------------------------------------------------|---------------------------------|---------------------------------|
| <b>Baseline anti-PLA<sub>2</sub>R</b>                                | <b>r=0.517</b><br>p=0.00981     | NS                              |
| <b>1 month anti-PLA<sub>2</sub>R</b>                                 | <b>r=0.764</b><br>p=0.0000002   | <b>r=0.663</b><br>p=0.00188     |
| <b>3 month anti-PLA<sub>2</sub>R</b>                                 | <b>r=0.821</b><br>p=0.0000002   | <b>r=0.818</b><br>p=0.0000002   |
| <b>6 month anti-PLA<sub>2</sub>R</b>                                 | <b>r=0.620</b><br>p=0.00349     | <b>r=0.484</b><br>p=0.0484      |
| <b>12 month anti-PLA<sub>2</sub>R</b>                                | <b>r=0.457</b><br>p=0.0281      | NS                              |
| <b>1 month % baseline anti-PLA<sub>2</sub>R</b>                      | <b>r=0.615</b><br>p=0.00237     | <b>r=0.586</b><br>p=0.0084      |
| <b>3 month % baseline anti-PLA<sub>2</sub>R</b>                      | <b>r=0.757</b><br>p=0.0000002   | <b>r=0.777</b><br>p=0.0000002   |
| <b>6 month % baseline anti-PLA<sub>2</sub>R</b>                      | <b>r=0.616</b><br>p=0.00381     | NS                              |
| <b>12 month % baseline anti-PLA<sub>2</sub>R</b>                     | <b>r=0.448</b><br>p=0.0317      | NS                              |
| <b>Slope log<sub>10</sub> (anti-PLA<sub>2</sub>R) through 6 mo.</b>  | <b>r=0.694</b><br>p=0.000121    | <b>r=0.528</b><br>p=0.02        |
| <b>Slope log<sub>10</sub> (anti-PLA<sub>2</sub>R) through 12 mo.</b> | NS                              | NS                              |

**Supplemental Table 1:** Anti-PLA<sub>2</sub>R levels at various time points were expressed as actual levels (in arbitrary densitometric units) or as a percentage of the baseline value and correlated with 12 and 24 month proteinuria. Correlation coefficients and p values are provided for significant ( $p < 0.05$ ) correlations. The slopes of log<sub>10</sub> transformed anti-PLA<sub>2</sub>R level over the first 6 or 12 months of follow-up were also calculated and correlated with 12 and 24 month proteinuria values. We assigned a value of 500 (half of our threshold detection value) to anti-PLA<sub>2</sub>R values less than 500, in order to limit the influence of these low values in our log<sub>10</sub>-transformed plots and calculations of slope.

|                                                    | <b>Total</b>    | <b>aPLA<sub>2</sub>R positive</b> | <b>aPLA<sub>2</sub>R negative</b> | <b>P value</b> |
|----------------------------------------------------|-----------------|-----------------------------------|-----------------------------------|----------------|
| <b>N =</b>                                         | 35              | 25                                | 10                                |                |
| <b>Age (± SD), yr</b>                              | 48 ± 11         | 49 ± 12                           | 47 ± 10                           | 0.67           |
| <b>Gender (M:F)</b>                                | 30:5            | 22:3                              | 8:2                               | 0.54           |
| <b>Disease duration (range), mo</b>                | 10 (4-144)      | 10 (4-144)                        | 9 (5-108)                         | 0.81           |
| <b>Serum Cr (± SD), mg/dl</b>                      | 1.5 ± 0.5       | 1.5 ± 0.5                         | 1.4 ± 0.5                         | 0.68           |
| <b>Cr Cl (± SD), ml/min/1.73 m<sup>2</sup></b>     | 78 ± 32         | 74 ± 31                           | 87 ± 34                           | 0.28           |
| <b>Proteinuria (range), g/24 hr</b>                | 10.8 (5.7-26.5) | 10.8 (7.0-26.5)                   | 9.9 (5.7-23.4)                    | 0.41           |
| <b>Anti-PLA<sub>2</sub>R (densitometric units)</b> |                 | 24882 (9395-31994)                | 0                                 | < 0.001        |

**Supplemental Table 2:** Baseline characteristics of the combined rituximab treatment cohorts comparing patients positive and negative for anti-PLA<sub>2</sub>R (with p value). Baseline demographics of the entire population are provided as a reference. Cr, creatinine; Cr Cl, creatinine clearance; aPLA<sub>2</sub>R, anti-PLA<sub>2</sub>R.
